# Supplementary material for: Organic carbonized copper foil facilitates the performance of the current collector for lithium-ion batteries
Source: Royal Society of Chemistry journal article supplement (doi:10.1039/d2qm00442a), 2022-01-01
Supplement: d2qm00442a1.pdf [file d2qm00442a1.pdf]

# **Organic carbonized copper foil facilitates the performance of current collector for lithium-ion batteries**

Ze'en Xiao<sup>[a]</sup>, Xianfa Rao<sup>[a]</sup>, Jun Chen\*<sup>[a]</sup>, Hanna Potapenko<sup>[b]</sup>, Qian Zhang<sup>[a]</sup>, and Shengwen  
Zhong\*<sup>[a]</sup>

<sup>[a]</sup> *Jiangxi Key Laboratory of Power Batteries and Materials, Faculty of Materials Metallurgy and Chemistry,  
Jiangxi University of Sciences and Technology, Ganzhou 341000, China, E-mail: [chenjun@jxust.edu.cn](mailto:chenjun@jxust.edu.cn),  
[zhongshw@126.com](mailto:zhongshw@126.com)*

<sup>[b]</sup> *Joint Department of Electrochemical Energy Systems, 38A Vernadsky Ave, Kiev, 03142, Ukraine*

# 1. Electrochemical corrosion device and parameters estimated by extrapolation of Tafel curves

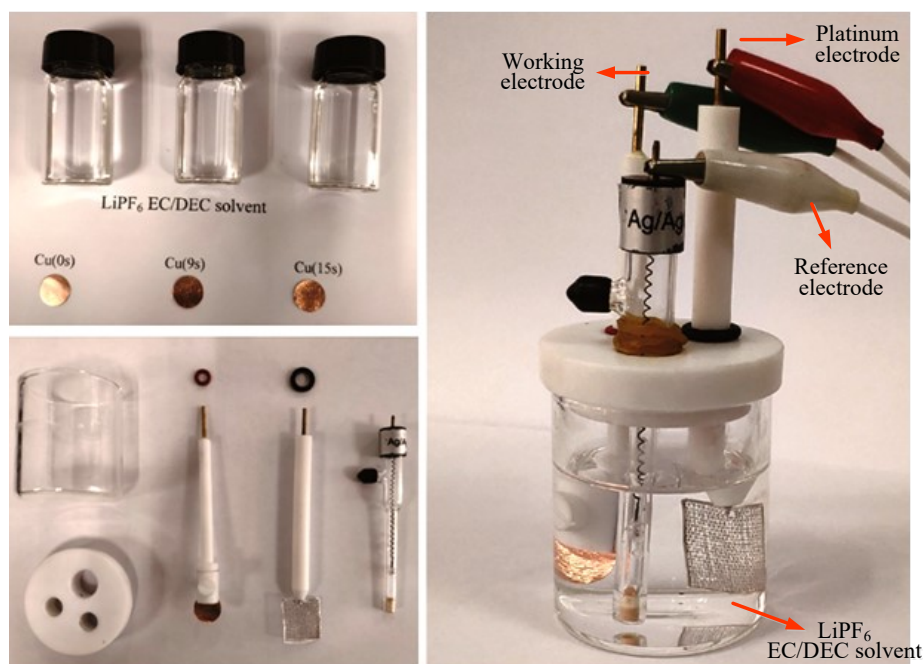

**Fig. S1** Physical diagram of electrochemical corrosion process

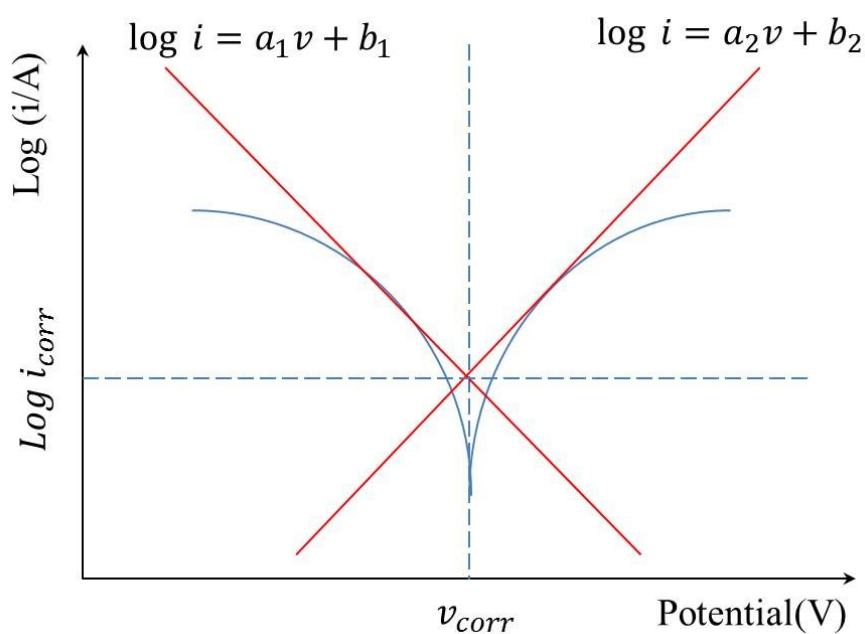

**Fig. S2** Electrochemical corrosion parameters listed in Table 1 are estimated by extrapolation of Tafel curves

## 2. XRD patterns of copper foil before and after calcination

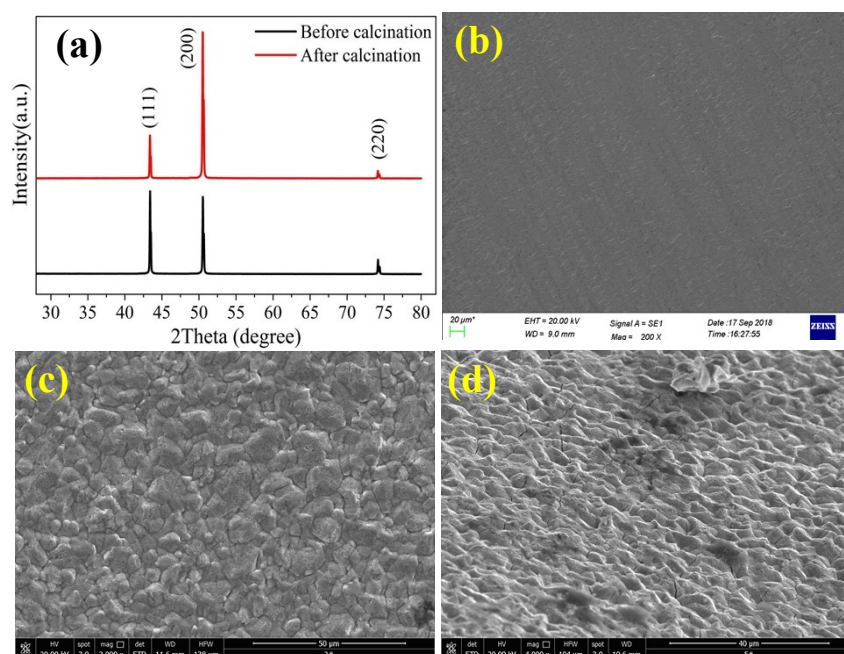

**Fig. S3** (a) XRD diffraction patterns; (b) SEM image of pristine copper foil; (c-d) SEM images of copper foil before and after calcination

## 3. Comparison of Organic Carbon Copper Foil Electrodes with Different Thickness ( $7.5\ \mu\text{m}$ and $2.8\ \mu\text{m}$ )

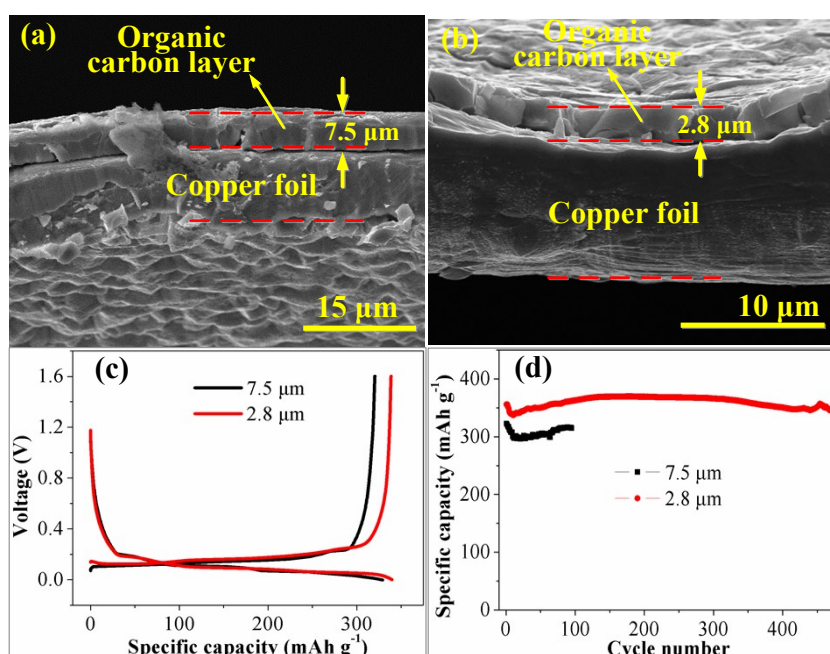

**Fig. S4** (a-b) SEM images of organic carbon modified Cu foil with different thickness ( $7.5\ \mu\text{m}$  and  $2.8\ \mu\text{m}$ ); (c) Initial charge/discharge curves of organic carbon modified Cu foil with different thickness ( $7.5\ \mu\text{m}$  and  $2.8\ \mu\text{m}$ ); (d) Cycle performance of organic carbon modified Cu foil with different thickness ( $7.5\ \mu\text{m}$  and  $2.8\ \mu\text{m}$ ).

#### 4. Charge/discharge performance of organic carbon layer/Li battery

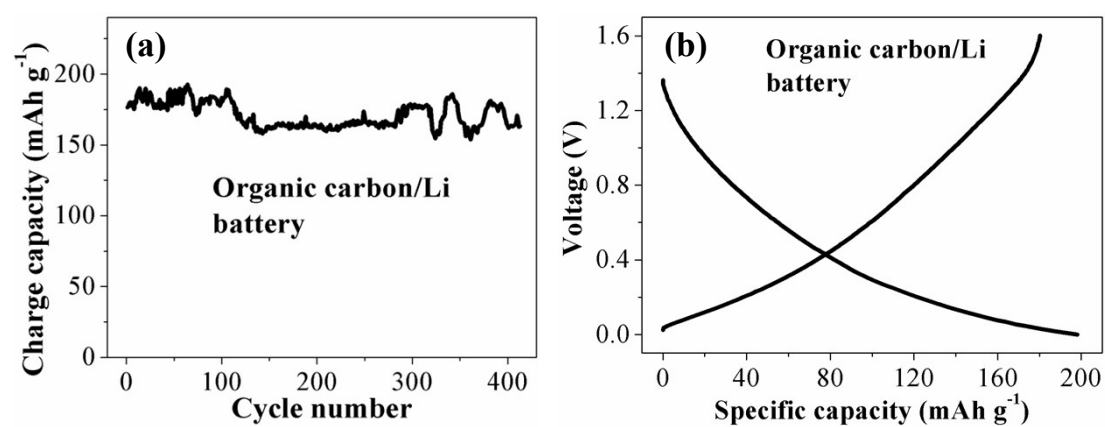

Fig. S5 Charge/discharge performance of organic carbon layer (2.8  $\mu\text{m}$ )/Li battery
